# Supplementary material for: Transfer Functions of Ammonia and Partly Cracked Ammonia Swirl Flames
Source: MDPI journal article supplement (doi:10.3390/en16031323), 2023-01-27
Supplement: s1 [file s1]

### EQUIVALENCE RATIO AT BLOW-OFF

[illegible]

[illegible]
