# Supplementary material for: Transfer Functions of Ammonia and Partly Cracked Ammonia Swirl Flames
Source: MDPI journal article supplement (doi:10.3390/en16031323), 2023-01-27
Supplement: s1 [file s1]

## HOT WIRE CALIBRATION

|          | Pure NH3 |           | 10% cracking |           | 20% cracking |           | 28% cracking |           |
|----------|----------|-----------|--------------|-----------|--------------|-----------|--------------|-----------|
| Velocity | Voltage  | Error     | Voltage      | Error     | Voltage      | Error     | Voltage      | Error     |
| m/s      | V        | V         | V            | V         | V            | V         | V            | V         |
| 0        | 0.4264   | 0.00236   | 0.42629      | -7.10E-04 | 0.42601      | -0.00102  | 0.42512      | -0.00129  |
| 0.50001  | 0.43664  | -3.60E-04 | 0.4503       | -8.00E-04 | 0.45796      | -3.60E-04 | 0.4662       | -0.00112  |
| 1.00002  | 0.4489   | -4.00E-04 | 0.4638       | -3.00E-04 | 0.47147      | -8.40E-04 | 0.48042      | -0.00149  |
| 1.50004  | 0.45878  | -3.40E-04 | 0.4734       | -0.0011   | 0.48178      | -3.20E-04 | 0.4918       | -0.00113  |
| 2.00005  | 0.46736  | -3.40E-04 | 0.48173      | -0.00127  | 0.49084      | -0.00107  | 0.50065      | -0.00109  |
| 2.49996  | 0.4746   | -1.10E-04 | 0.48916      | -8.40E-04 | 0.49819      | -0.00104  | 0.5077       | -9.30E-04 |
| 2.99998  | 0.48048  | -2.00E-04 | 0.49489      | -1.10E-04 | 0.50515      | -0.00177  | 0.5149       | -9.40E-04 |
| 3.49999  | 0.48623  | -1.90E-04 | 0.501        | -9.00E-04 | 0.51087      | -5.40E-04 | 0.5211       | -0.00157  |
| 4        | 0.4913   | -2.60E-04 | 0.5064       | -4.00E-04 | 0.51555      | -0.00131  | 0.52713      | -0.00113  |
| 4.36103  | 0.4965   | -2.50E-04 | 0.5104       | 0.0023    | 0.52128      | -8.40E-04 | 0.5324       | -0.00101  |
| 5.00002  | 0.5006   | -1.10E-04 | 0.5156       | -9.00E-04 | 0.52655      | -9.60E-04 | 0.53697      | -8.00E-05 |
| 5.50003  | 0.50477  | -2.30E-04 | 0.51921      | -8.90E-04 | 0.53036      | -9.30E-04 | 0.54214      | -9.30E-04 |
| 6.00005  | 0.50812  | -1.80E-04 | 0.52318      | -8.20E-04 | 0.53391      | -2.10E-04 | 0.54606      | -0.00195  |
| 6.49996  | 0.5123   | -5.00E-05 | 0.52666      | -3.40E-04 | 0.53834      | -1.70E-04 | 0.55035      | -0.00124  |
| 6.99998  | 0.51543  | -5.00E-05 | 0.5304       | -5.00E-04 | 0.5421       | -8.10E-04 | 0.55442      | -5.20E-04 |
| 7.49999  | 0.5186   | -3.00E-04 | 0.53348      | -5.20E-04 | 0.5452       | -0.00112  | 0.5578       | -0.00111  |
| 8        | 0.52172  | -2.20E-04 | 0.53704      | -0.00196  | 0.54861      | -8.80E-04 | 0.56166      | -0.00103  |
| 8.50001  | 0.52447  | -2.70E-04 | 0.54003      | -9.70E-04 | 0.552        | -0.00151  | 0.56547      | -4.30E-04 |
| 9.00002  | 0.52753  | -5.50E-04 | 0.54294      | 0.00144   | 0.55575      | -6.60E-04 | 0.5685       | -4.90E-04 |
| 9.50003  | 0.53079  | -1.60E-04 | 0.54602      | 0.00102   | 0.5593       | -8.50E-04 | 0.5719       | -0.001    |
| 10.00024 | 0.53333  | -2.30E-04 | 0.54883      | -0.00127  | 0.56248      | -6.80E-04 | 0.57509      | -8.90E-04 |
