# Supplementary material for: Transfer Functions of Ammonia and Partly Cracked Ammonia Swirl Flames
Source: MDPI journal article supplement (doi:10.3390/en16031323), 2023-01-27
Supplement: s1 [file s1]

**NO<sub>x</sub> CONCENTRATIONS**

| Percentage of NH <sub>3</sub> cracking | [NO]+[NO <sub>2</sub> ] | Error |
|----------------------------------------|-------------------------|-------|
| %                                      | ppm                     | ppm   |
| 0                                      | 2882                    | 288   |
| 10                                     | 2937                    | 294   |
| 20                                     | 4920                    | 492   |
| 28                                     | 6622                    | 662   |

|                   | Pure NH <sub>3</sub> |       | 10% cracking    |       | 20% cracking    |       | 28% cracking    |       |
|-------------------|----------------------|-------|-----------------|-------|-----------------|-------|-----------------|-------|
| Equivalence ratio | Corrected [Nox]      | Error | Corrected [Nox] | Error | Corrected [Nox] | Error | Corrected [Nox] | Error |
|                   | ppm                  | ppm   | ppm             | ppm   | ppm             | ppm   | ppm             | ppm   |
| 0.55              |                      |       |                 |       | 115             | 11    | 66              | 19    |
| 0.65              |                      |       | 117             | 19    | 276             | 33    | 1093            | 109   |
| 0.75              |                      |       | 295             | 29    | 1204            | 120   | 2171            | 217   |
| 0.8               | 454                  | 23    |                 |       |                 |       |                 |       |
| 0.85              | 649                  | 32    | 738             | 73    | 1571            | 157   | 2459            | 246   |
| 0.9               | 750                  | 75    |                 |       |                 |       |                 |       |
| 0.95              | 736                  | 73    | 791             | 79    | 1380            | 138   | 1948            | 194   |
