# Supplementary material for: Transfer Functions of Ammonia and Partly Cracked Ammonia Swirl Flames
Source: MDPI journal article supplement (doi:10.3390/en16031323), 2023-01-27
Supplement: s1 [file s1]

## FLAME TRANSFER FUNCTIONS

| Frequency | Pure ammonia | 10%      | 20%      | 28%      |
|-----------|--------------|----------|----------|----------|
| Hz        |              |          |          |          |
| 16        | 1.161199394  | 1.556005 | 1.240955 | 1.039073 |
| 32        | 0.958196953  | 1.503965 | 0.927817 | 0.839518 |
| 48        | 0.519831516  | 1.0019   | 1.026489 | 1.010928 |
| 64        | 0.122464476  | 0.761369 | 1.173937 | 1.212083 |
| 80        | 0.034732469  | 0.248142 | 1.175536 | 1.170048 |
| 96        | 0.020116568  | 0.393711 | 1.0275   | 0.932552 |
| 112       | 0.016450089  | 0.781079 | 0.87548  | 0.746216 |
| 128       | 0.015213188  | 1.017392 | 0.886807 | 0.698053 |
| 144       | 0.029487514  | 1.000458 | 1.053319 | 0.817399 |
| 160       | 0.030925772  | 0.851803 | 1.27211  | 0.972024 |
| 176       | 0.019125377  | 0.664695 | 1.377957 | 1.112623 |
| 192       | 0.012442038  | 0.456366 | 1.411391 | 1.239983 |
| 208       | 0.007000621  | 0.378753 | 1.333585 | 1.196122 |
| 224       | 0.003784508  | 0.352522 | 1.241491 | 1.159738 |
| 240       | 0.002224963  | 0.323042 | 1.163516 | 1.126393 |
| 256       | 0.003302995  | 0.272764 | 1.057086 | 1.067261 |
| 272       | 0.001379742  | 0.235457 | 0.890668 | 0.941386 |
| 288       | 0.000969848  | 0.171466 | 0.741806 | 0.801387 |
| 304       | 0.002012494  | 0.126823 | 0.550564 | 0.603272 |
| 320       | 0.001178626  | 0.105205 | 0.477555 | 0.568733 |
| 336       | 0.001149407  | 0.09661  | 0.472134 | 0.639809 |
| 352       | 0.000471693  | 0.077617 | 0.472877 | 0.747799 |
| 368       | 0.00098889   | 0.074152 | 0.435578 | 0.79417  |
| 384       | 0.002236339  | 0.062431 | 0.384434 | 0.786775 |
| 400       | 0.001209542  | 0.048971 | 0.323499 | 0.737377 |
| 416       |              |          | 0.220648 | 0.658006 |
| 432       |              |          | 0.169081 | 0.547331 |
| 448       |              |          | 0.127668 | 0.453574 |
| 464       |              |          | 0.118776 | 0.373996 |
| 480       |              |          | 0.097591 | 0.319818 |
| 496       |              |          | 0.099128 | 0.324861 |
| 512       |              |          | 0.099026 | 0.318887 |
| 528       |              |          | 0.082228 | 0.256584 |
| 544       |              |          | 0.068702 | 0.2648   |
| 560       |              |          | 0.037465 | 0.211899 |
| 576       |              |          | 0.062469 | 0.253752 |
| 592       |              |          | 0.048659 | 0.209433 |
| 608       |              |          | 0.031019 | 0.169168 |
| 624       |              |          |          | 0.148044 |
| 640       |              |          |          | 0.119807 |
| 656       |              |          |          | 0.117733 |
