# Supplementary material for: Transfer Functions of Ammonia and Partly Cracked Ammonia Swirl Flames
Source: MDPI journal article supplement (doi:10.3390/en16031323), 2023-01-27
Supplement: s1 [file s1]

## OVERALL BURNING VELOCITY AND FLAME LENGTH

| Percentage of cracking | Flame length | Uncertainty | S_burn | Uncertainty |
|------------------------|--------------|-------------|--------|-------------|
| %                      | cm           | cm          | cm/s   | cm/s        |
| 0                      | 12.32        | 1.5         | 5.2    | 0.5         |
| 10                     | 5.87         | 0.6         | 14.2   | 1.5         |
| 20                     | 4.3          | 0.5         | 24.9   | 2.5         |
| 28                     | 3.6          | 0.5         | 32     | 3.5         |
